# Supplementary material
Source: publisher figshare collection journal article supplement (https://acs.figshare.com/ndownloader/files/5071057)
Supplement: Supplementary file 1 [file 5071057]

## Supporting Information.

### Conjugated Polyphenylacetylene Films Crosslinked with Electropolymerized Polycarbazole Precursors

*Timothy Fulghum<sup>1</sup>, S. M. Abdul Karim<sup>2</sup>, Akira Baba<sup>1</sup>, Prasad Taranekar<sup>1</sup>, Takafumi Nakai<sup>2</sup>,*

*Toshio Masuda<sup>2\*</sup>, and Rigoberto C. Advincula<sup>1\*</sup>*

<sup>1</sup>Department of Chemistry, University of Houston, Houston, TX 77204-5003 USA

<sup>2</sup>Department of Polymer Chemistry, Graduate School of Engineering, Kyoto University, Kyoto 606-8501, JAPAN

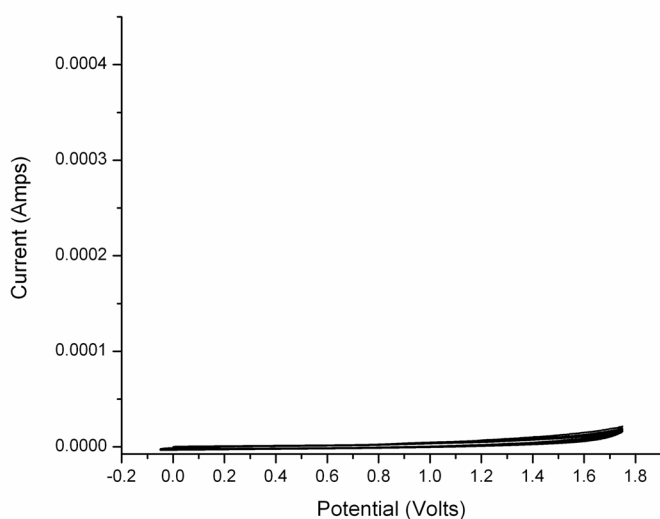

**Figure 1.** CV scan of PPA control to determine the degradation of the C=C double bond in the polymer backbone. The CV of the polyphenylacetylene (PPA) control at 0.5 mg/ml in 0.1 M TBAH /CH<sub>2</sub>Cl<sub>2</sub> solution, 50mV/s. From the anodic CV trace, no onset of oxidation is observed up to 1.8 V vs. Ag / AgCl.

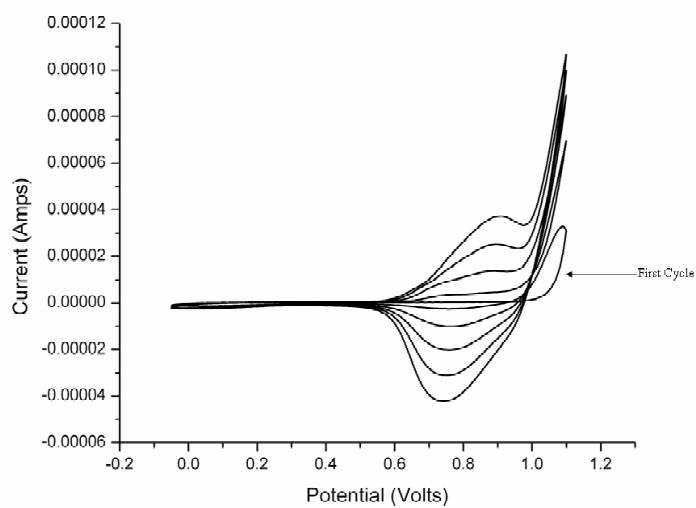

a)

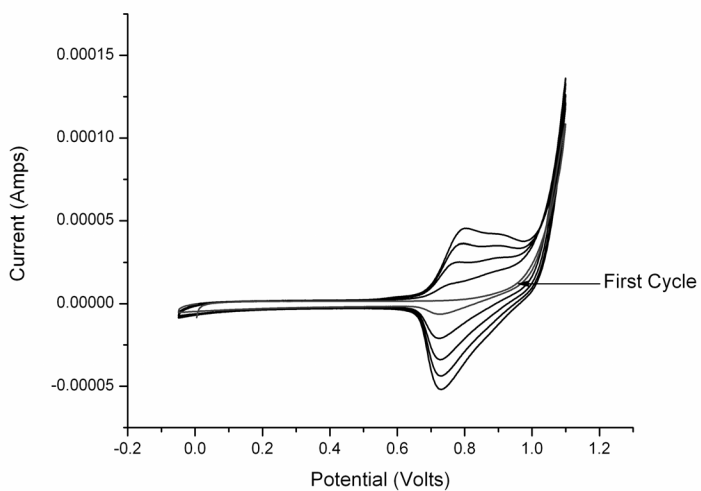

b)

**Figure 2)** a) 5 Cycle CV for electrochemical crosslinking/deposition of PPA-C3-Cz at a scan rate of 50mv/sec. b) 5 Cycle CV for electrochemical crosslinking/deposition of PPA-C6-Cz at a scan rate of 50mv/sec.

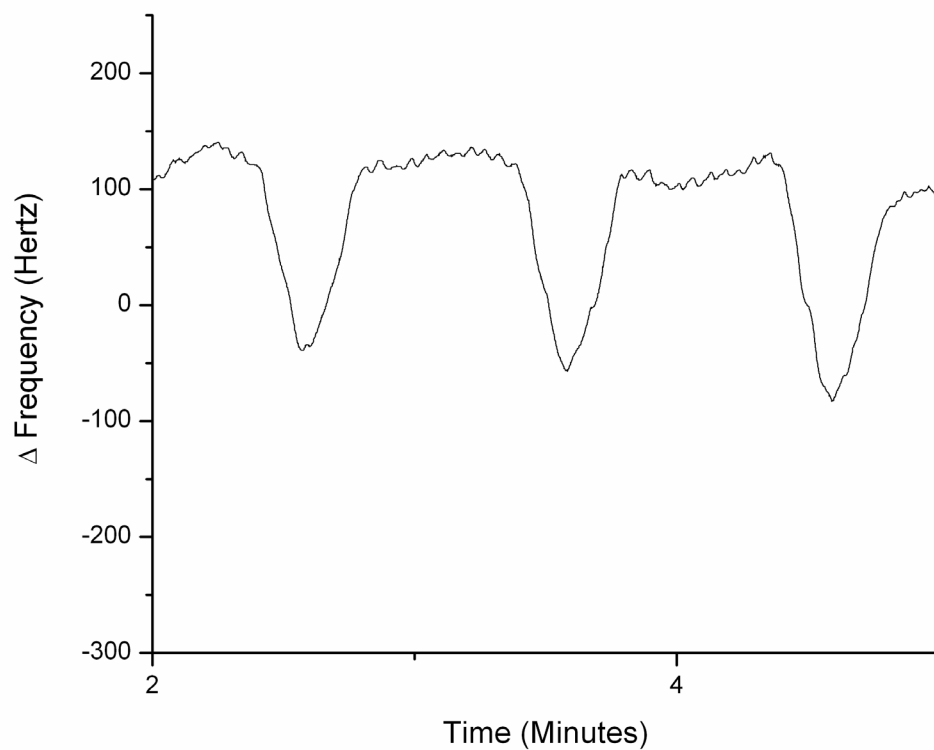

**Figure 3.** Monomer free E-QCM study.  $\Delta$ Frequency Vs. Time showing the doping dedoping of supporting electrolyte into the film, but no permanent gain or loss of mass.
